# Supplementary material for: Ecosystem-specific patterns and drivers of global reactive iron mineral-associated organic carbon
Source: Copernicus journal article supplement (doi:10.5194/bg-2023-59), 2023-04-12
Supplement: Supplementary file 1 [file bg-2023-59-supplement.pdf]

1 **Ecosystem-specific patterns and drivers of global reactive iron**  
2 **mineral-associated organic carbon**

3 Bo Zhao<sup>1</sup>, Amin Dou<sup>1</sup>, Zhiwei Zhang<sup>1</sup>, Zhenyu Chen<sup>1</sup>, Wenbo Sun<sup>1</sup>, Yanli Feng<sup>1</sup>,  
4 Xiaojuan Wang<sup>2</sup>, Qiang Wang<sup>1,\*</sup>

5 *<sup>1</sup>State Key Laboratory of Herbage Improvement and Grassland Agro-ecosystems,*  
6 *College of Pastoral Agriculture Science and Technology, Lanzhou University,*  
7 *Lanzhou 730000, China*

8 *<sup>2</sup>Natural History Research Center, Shanghai Natural History Museum, Shanghai*  
9 *Science & Technology Museum, 200127 Shanghai, China*

10 **\*Corresponding author:** Qiang Wang (Phone: +86-136-6933-7869; Email:  
11 wqiang@lzu.edu.cn)

12 **Type of paper:** Research Paper; Text pages: 24; Figures: 7

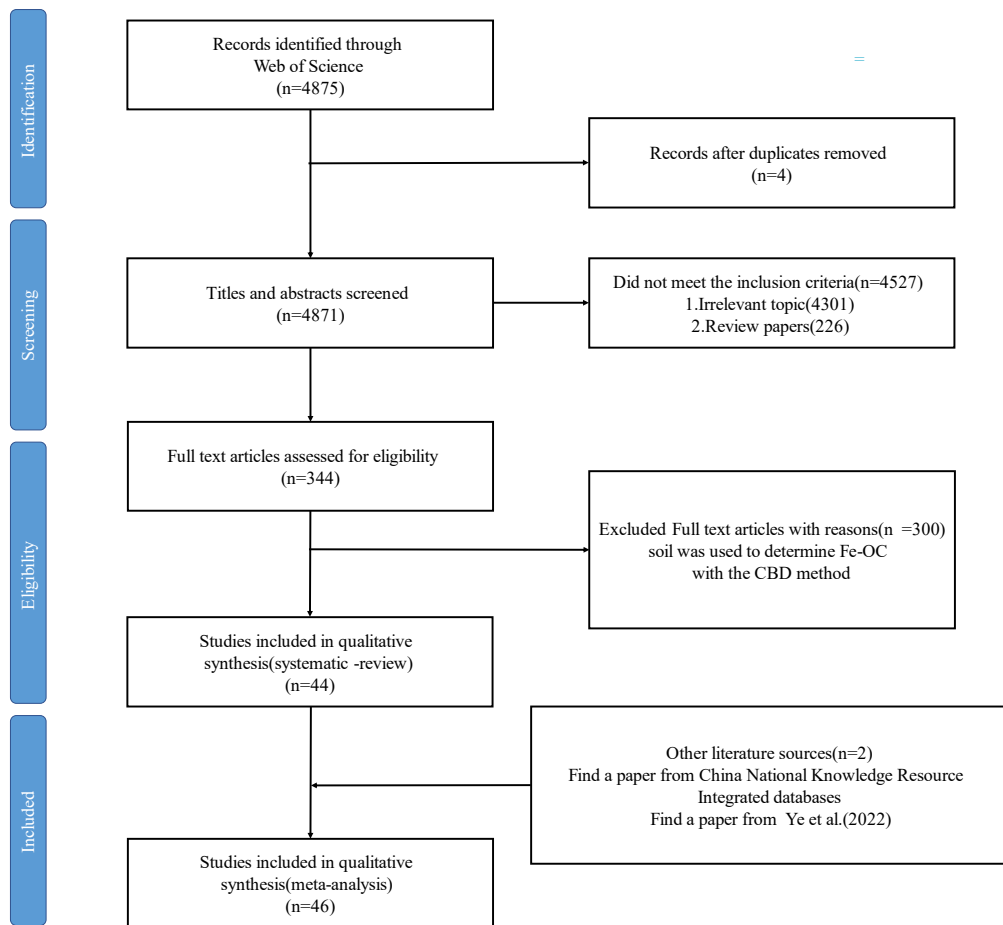

13

14 **Figure S1.** Preferred reporting items for systematic reviews and meta-analysis. See  
 15 details of literature search methods: (<https://www.webofscience.com/wos/allldb/summary/f8214414-7be5-4080-817b-7406a1f2247f-4f929e58/relevance/98>)  
 16  
 17

**(a) Continent**

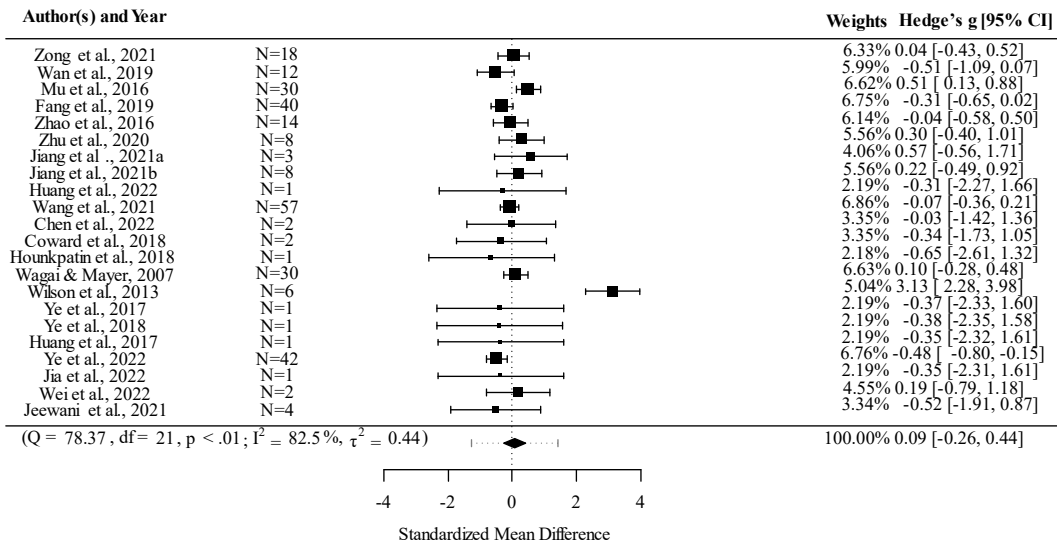

**(b) Marine**

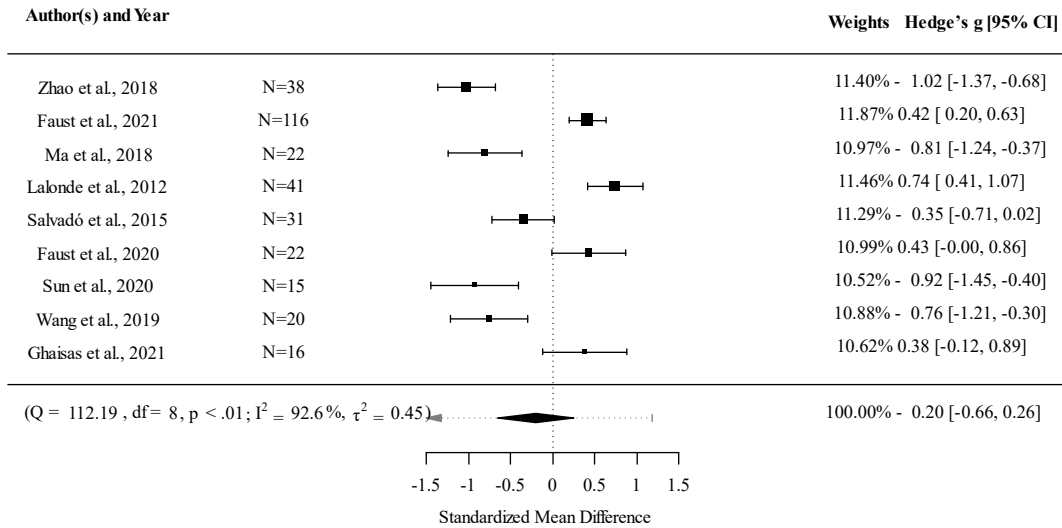

**(c) Wetlands**

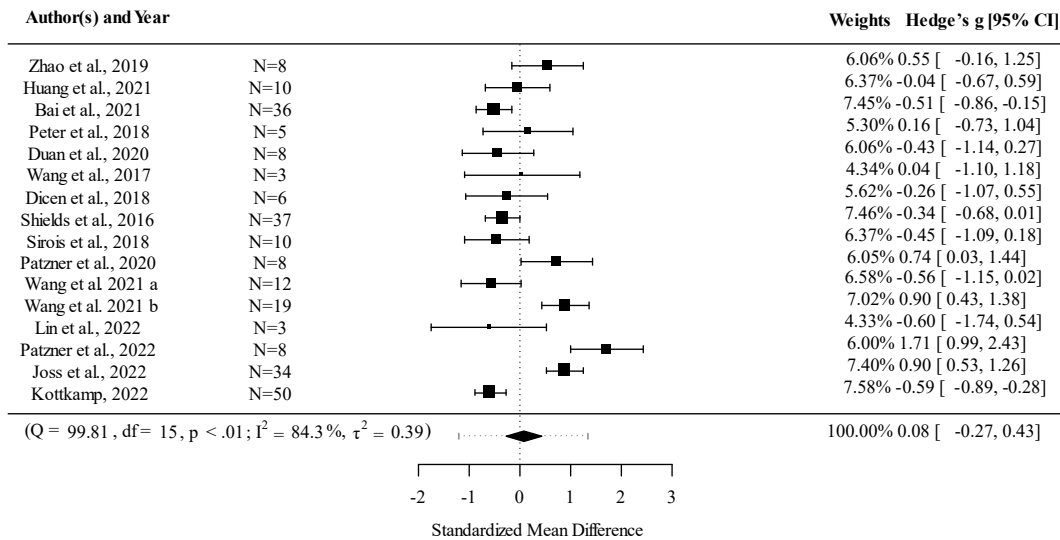

18 **Figure S2.** The effect sizes and confidence interval of the small sample sizes (i.e., a

19 single published article) on Fe-OC contents in continent (a), marine (b) and wetlands  
20 (c), respectively. The value of the coordinate corresponds to the effect sizes, which is  
21 calculated by using the standardized mean difference between the control group and  
22 the treatment group. The total samples classified by continent, marine and wetlands  
23 are the control group, and the samples of a single case are the treatment group. The  
24 square size of each treatment group corresponds to the relative sample size. The  
25 horizontal line extending from each grid represents the confidence interval. The  
26 weights and confidence intervals of each group of effects are shown on the right. The  
27 position of each grid means that the Fe-OC of each treatment group is either higher  
28 (to the right of the dotted line) or lower (to the left of the dotted line) than that of the  
29 control group. The vertical dotted line is the zero effect quantity, and the confidence  
30 interval that does not overlap with the zero effect quantity is significantly different  
31 from the Fe-OC of the control group. Partial effects and their confidence intervals do  
32 not overlap with zero effects. The letter N represents the number of samples.
